# Supplementary material for: Non-Invasive Prediction of IDH Mutation in Patients with Glioma WHO II/III/IV Based on F-18-FET PET-Guided In Vivo 1H-Magnetic Resonance Spectroscopy and Machine Learning
Source: MDPI journal article supplement (doi:10.3390/cancers12113406), 2020-11-17
Supplement: s1 [file s1]

# **Supplementary material: Non-invasive prediction of *IDH* mutation in patients with glioma WHO II/III/IV based on F-18-FET PET-guided *in vivo* <sup>1</sup>H-magnetic resonance spectroscopy and machine learning**

**Elisabeth Bumes<sup>1\*#</sup>, Fro-Philip Wirtz<sup>2#</sup>, Claudia Fellner<sup>3</sup>, Jirka Grosse<sup>4</sup>, Dirk Hellwig<sup>4</sup>, Peter J. Oefner<sup>2</sup>, Martina Häckl<sup>2</sup>, Ralf Linker<sup>1</sup>, Martin Proescholdt<sup>5</sup>, Nils Ole Schmidt<sup>5</sup>, Markus J. Riemenschneider<sup>6</sup>, Claudia Samol<sup>2</sup>, Katharina Rosengarth<sup>5</sup>, Christina Wendl<sup>3</sup>, Peter Hau<sup>1</sup>, Wolfram Gronwald<sup>2+</sup>, Markus Hutterer<sup>1,6+</sup>**

<sup>1</sup>Department of Neurology and Wilhelm Sander-NeuroOncology Unit, Regensburg University Hospital, Regensburg, Germany

<sup>2</sup>Institute of Functional Genomics, University of Regensburg, Regensburg, Germany

<sup>3</sup>Department of Radiology and Division of Neuroradiology, Regensburg University Hospital, Regensburg, Germany

<sup>4</sup>Department of Nuclear Medicine, Regensburg University Hospital, Regensburg, Germany

<sup>5</sup>Department of Neurosurgery, Regensburg University Hospital, Regensburg, Germany

<sup>6</sup>Department of Neuropathology, Regensburg University Hospital, Regensburg, Germany

<sup>7</sup>Department of Neurology, Saint John of God Hospital Linz, Linz, Austria

<sup>#</sup>shared first authorship, <sup>+</sup>shared last authorship

\*Correspondence: [elisabeth.bumes@ukr.de](mailto:elisabeth.bumes@ukr.de); Tel.: +0049-0941-944-18751

Supplementary Material: Figure S1

CONSORT Flow Diagram

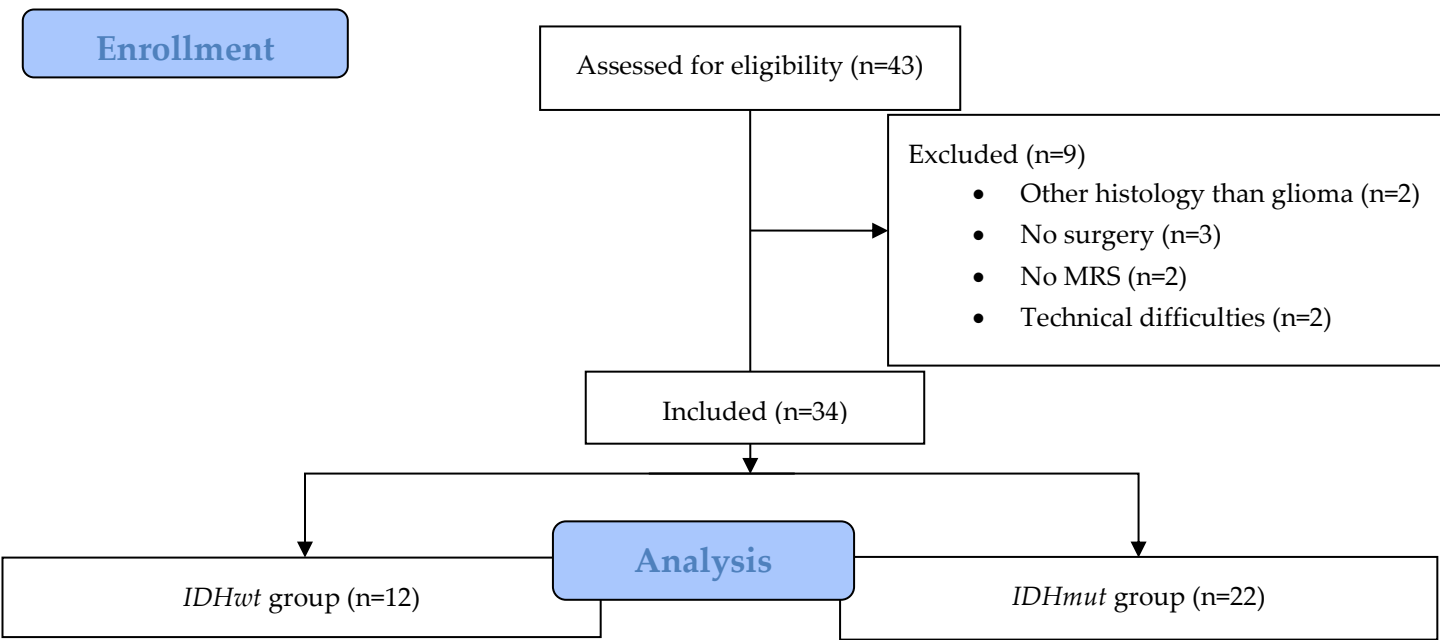

Figure S1: Consort flow diagram showing the patient enrollment.

**Supplementary Material: Figure S2**

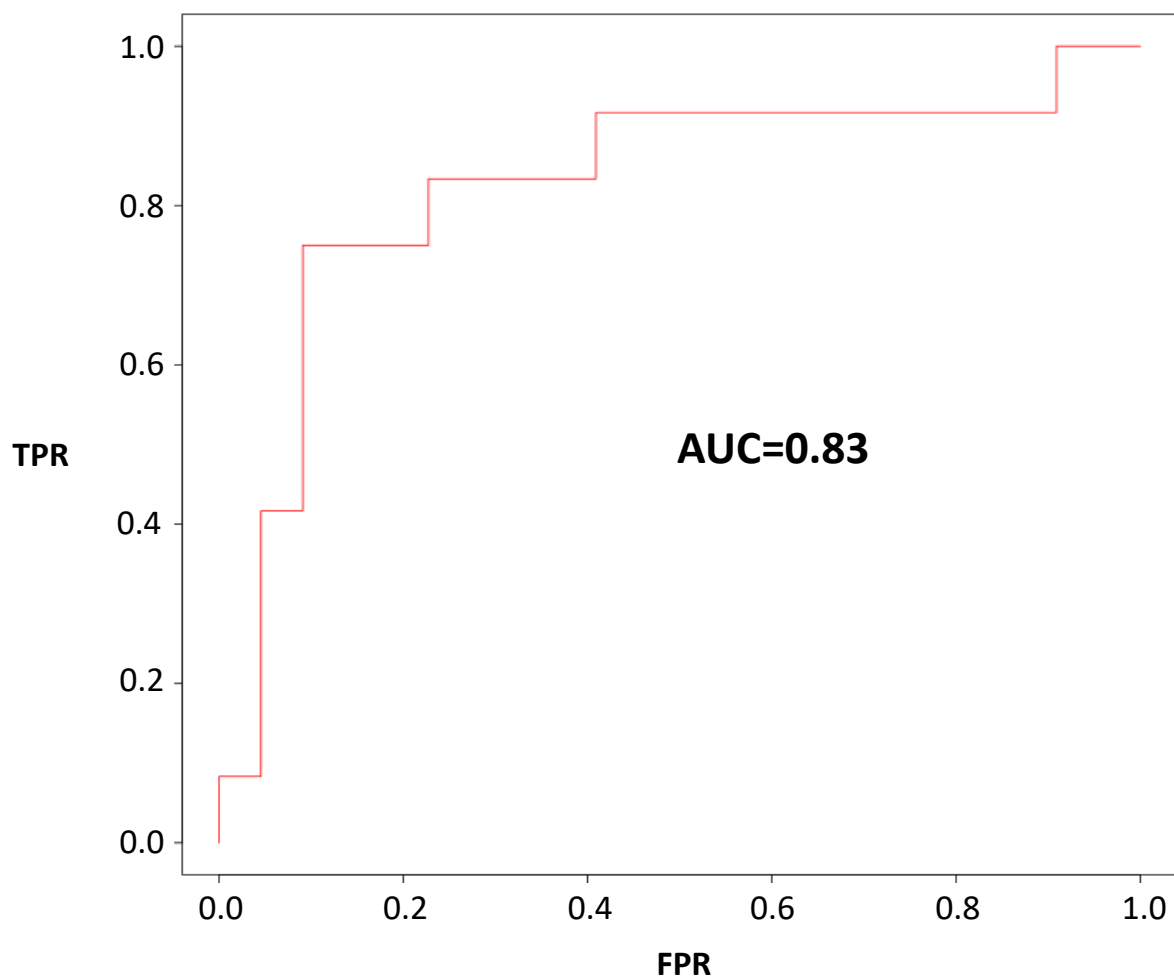

**Figure S2.** Prognostication of IDH status by linear SVM. Prognostication performance was assessed by analysis of the ROC curve.
